# Supplementary material for: Biomarkers of primary dysmenorrhea and herbal formula intervention: an exploratory metabonomics study of blood plasma and urine
Source: Royal Society of Chemistry journal article supplement (doi:10.1039/c2mb25238d), 2012-10-12

## Supporting Information

### TEXT 1S MEDICAL QUESTIONNAIRE

|                       |  |                         |  |
|-----------------------|--|-------------------------|--|
| <b>Full Name</b>      |  | <b>Occupation</b>       |  |
| <b>Address</b>        |  |                         |  |
| <b>E-mail Address</b> |  |                         |  |
| <b>Weight</b>         |  | <b>Height</b>           |  |
| <b>Marital Status</b> |  | <b>Fertility Status</b> |  |

#### Statement of Health

*The Medical Examiner is requested to ask the following questions or to review them if they have been answered previously. Give details and dated if any of the questions below are answered with "Yes"*

1. Do you currently have any health problems? Yes ☐ No ☐

---



---

2. Have you ever been hospitalized? Yes ☐ No ☐

---



---

3. Have you visited a doctor in the last three (3) years? Yes ☐ No ☐

---



---

4. Do you suffer from or have you ever suffered from any of the following

(a) Tuberculosis Yes ☐ No ☐

(b) Leprosy Yes ☐ No ☐

(c) Hepatitis (seecify type) Yes ☐ No ☐

(d) Typhoid, dysentery or any other infectious or Communicable diseases Yes ☐ No ☐

(e) AIDS or AIDS related conditions, any Immune Deficiency Syndrome Yes ☐ No ☐

(f) Genetic or Familial Disorders Yes ☐ No ☐

(g) Deafness or Chronic Ear Disease Yes ☐ No ☐

(h) Blindness or Eye Disease Yes ☐ No ☐

(i) Any cancerous disease: benign/malignant Yes ☐ No ☐

(j) Headache migraine, epilepsy or dizziness Yes ☐ No ☐

(k) Nervous or mental illness or disorders Yes ☐ No ☐

(l) Any allergies, asthma or pulmonary disease Yes ☐ No ☐

(m) Cardiovascular diseases, arterial Hypertension Yes ☐ No ☐

(n) Liver, stomach or intestinal diseases Yes ☐ No ☐

(o) Diabetes or other hormone diseases Yes ☐ No ☐

- |                                                |                              |                             |
|------------------------------------------------|------------------------------|-----------------------------|
| (p) Urinary tract disease                      | Yes <input type="checkbox"/> | No <input type="checkbox"/> |
| (q) Venereal diseases                          | Yes <input type="checkbox"/> | No <input type="checkbox"/> |
| (r) Rheumatism, Muscle, Joint or bone diseases | Yes <input type="checkbox"/> | No <input type="checkbox"/> |
| (s) Skin diseases                              | Yes <input type="checkbox"/> | No <input type="checkbox"/> |
| (t) Consmetic operations                       | Yes <input type="checkbox"/> | No <input type="checkbox"/> |
| (u) Any other illness or disorder              | Yes <input type="checkbox"/> | No <input type="checkbox"/> |

**If “Yes” to any of the above, please give details and dates.**

---



---



---

5. How old do you first menarche?

---

6. How long of your menstrual cycle?

---

7. What about your menstrual quality?

- ☐ Color red, without blood clot   ☐ Color bleak, no congestion   ☐ Color bleak, with blood clot   ☐ Color red, with blood clot

8. Do you have any dysmenorrheal history? Yes ☐   No ☐

---



---

9. When do you feel pain in menstrual period?

- ☐ Before menstruation   ☐ During menstruation   ☐ After menstruation

10. What's duration of your dysmenorrheal?

- ☐ 1 Day   ☐ 2 Days   ☐ 3 Days   ☐  $\geq 4$  Days

11. How long do you suffer dysmenorrheal?

- ☐ 1 Year   ☐ 2-3 Years   ☐ 4-5 Years   ☐  $\geq 6$  Years

12. What type of dysmenorrhea do you think you suffered?

- ☐ Primary dysmenorrhea   ☐ Secondary dysmenorrhea   ☐ Uncertain

13. What do you think the reason caused dysmenorrhea?

- ☐ High pressure   ☐ Nervous in menstruation   ☐ Not pay attention to diet and keep warm in menstruation   ☐ Genetic factors   ☐ Irregular sleep   ☐ Environmental factors

14. How symptoms accompany with your dysmenorrhea?

☐ Abdominal pain, distension, lumbago   ☐ Nausea, vomiting and diarrhea   ☐  
Anxiety   ☐ Breast distending pain   ☐ Weak   ☐ Headache or dizziness

15. What dysmenorrheal degree do you think you suffered?

☐ Mild: Not to affect the life   ☐ Moderate: Affect the life   ☐ Severe: Affect the life severely

16. How do you to deal with dysmenorrhea?

☐ Not to do anything, just rest   ☐ Visit a doctor   ☐ Take tradition Chinese medicine  
☐ Take analgesics   ☐ Do some exercises

*The Medical Examiner is required to examine the applicant and to answer the following questions. Give details and dates if any of the questions below are answered with “Yes”.*

17. **Gynecological examination**-Any signs of abnormalities?                      Yes ☐   No ☐

---

---

---

---

18. **B-ultrasound examination**-Any signs of abnormalities?                      Yes ☐   No ☐

---

---

---

---

19. **Symptoms in traditional Chinese medicine**-Any signs of Qi stagnation syndrome?                      Yes ☐   No ☐

---

---

---

---

20. **Comments**

---

---

---

---

---

---

---

**Important: Please attach original results of the following**

**(i) Routine Blood and urine test**

**(ii) B-ultrasound test**

**Medical Examiner's Details and Declaration**

|                                     |  |                |                  |
|-------------------------------------|--|----------------|------------------|
| <b>Full Name and Qualifications</b> |  |                |                  |
| <b>Specialty</b>                    |  | <b>Address</b> |                  |
| <b>Email Address</b>                |  |                | <b>Telephone</b> |

**I hereby confirm that I have identified, questioned and examined the applicant and have answered all questions to the best of my knowledge and in good faith.**

\_\_\_\_\_  
Signature of Medical Examiner

\_\_\_\_\_  
Place and Date of Examination

\_\_\_\_\_  
Name and Stamp of Medical Examiner

**Table 1S.** Clinical Efficacy Assessment standard of Primary Dysmenorrhea

| Symptoms                                                                   | Scores                      |
|----------------------------------------------------------------------------|-----------------------------|
| Abdominal pain during the menstrual cycle or before and after menstruation | Yes 5; No 0                 |
| Obviously abdominal pain                                                   | Yes 5.5; No 0               |
| Abdominal pain is unbearable                                               | Yes 6; No 0                 |
| Abdominal pain is unable to sit down or sleep at ease                      | Yes 1; No 0                 |
| Abdominal pain effects of work and study                                   | Yes 1; No 0                 |
| Abdominal pain and need bed rest                                           | Yes 1; No 0                 |
| Using the general measures and relief the pain                             | Yes 0.5; No 0               |
| Using the general measures and afford no relief the pain                   | Yes 1; No 0                 |
| Pale                                                                       | Yes 0.5; No 0               |
| Cold sweat                                                                 | Yes 1; No 0                 |
| Peripheral coldness                                                        | Yes 1; No 0                 |
| Schock                                                                     | Yes 2; No 0                 |
| With the waist ache                                                        | Yes 0.5; No 0               |
| With the nausea and vomiting                                               | Yes 0.5; No 0               |
| With anal bulge                                                            | Yes 0.5; No 0               |
| Pain duration add one day the score add 0.5                                | Yes days $\times$ 0.5; No 0 |

**Table 2S.** UPLC - MS analytic results of Xiang-Fu-Si-Wu Formula

| No. | t <sub>R</sub><br>min | Ion<br>mode | Measured<br>Mass( <i>m/z</i> ) | Calc.<br>Mass( <i>m/z</i> ) | Error<br>(ppm) | Elemental<br>composition                                     | Compound                               | Quantit<br>ative<br>ions | Content<br>(mg/g<br>dry<br>extract) |
|-----|-----------------------|-------------|--------------------------------|-----------------------------|----------------|--------------------------------------------------------------|----------------------------------------|--------------------------|-------------------------------------|
| 1   | 1.86                  | neg         | 169.0136                       | 169.0137                    | -0.1           | C <sub>7</sub> H <sub>5</sub> O <sub>5</sub> <sup>-</sup>    | Gallic acid <sup>a</sup>               | 169.0                    | 6.68                                |
| 2   | 8.79                  | neg         | 179.0318                       | 179.0344                    | -1.5           | C <sub>9</sub> H <sub>7</sub> O <sub>4</sub> <sup>-</sup>    | Caffeic acid <sup>a</sup>              | 179.0                    | 1.72                                |
| 3   | 9.72                  | neg         | 353.0812                       | 353.0873                    | -1.7           | C <sub>16</sub> H <sub>17</sub> O <sub>9</sub> <sup>-</sup>  | Chlorogenic acid <sup>a</sup>          | 353.1                    | 8.13                                |
| 4   | 12.77                 | neg         | 479.1437                       | 479.1553                    | -2.4           | C <sub>23</sub> H <sub>27</sub> O <sub>11</sub> <sup>-</sup> | Albiflorin <sup>a</sup>                | 479.1                    | 54.4                                |
| 5   | 13.45                 | neg         | 479.1416                       | 479.1553                    | -2.9           | C <sub>23</sub> H <sub>27</sub> O <sub>11</sub> <sup>-</sup> | Peoniflorin <sup>a</sup>               | 479.1                    | 68.7                                |
| 6   | 16.11                 | neg         | 193.0488                       | 193.0501                    | -0.7           | C <sub>10</sub> H <sub>9</sub> O <sub>4</sub> <sup>-</sup>   | Ferulaic acid <sup>a</sup>             | 193.0                    | 6.91                                |
| 7   | 23.78                 | neg         | 249.1477                       | 249.1491                    | -0.6           | C <sub>15</sub> H <sub>21</sub> O <sub>3</sub> <sup>-</sup>  | Neolazppaic acid                       | 249.1                    | 3.22 <sup>b</sup>                   |
| 8   | 30.01                 | neg         | 203.0679                       | 203.0708                    | -1.4           | C <sub>12</sub> H <sub>11</sub> O <sub>3</sub> <sup>-</sup>  | 3-butylidene-7-hydrox<br>yphthalide    | 203.1                    | 12.5 <sup>b</sup>                   |
| 9   | 30.78                 | neg         | 231.1358                       | 231.1385                    | -1.2           | C <sub>15</sub> H <sub>19</sub> O <sub>2</sub> <sup>-</sup>  | Costunolide                            | 231.1                    | 3.02 <sup>b</sup>                   |
| 10  | 31.20                 | neg         | 255.2295                       | 255.2324                    | -1.1           | C <sub>16</sub> H <sub>31</sub> O <sub>2</sub> <sup>-</sup>  | Palmitic acid                          | 255.2                    | 2.40 <sup>b</sup>                   |
| 11  | 15.93                 | pos         | 342.1728                       | 342.1705                    | 0.7            | C <sub>20</sub> H <sub>24</sub> NO <sub>4</sub> <sup>+</sup> | Tetrahydrocolumbami<br>ne <sup>a</sup> | 342.2                    | 0.94                                |
| 12  | 16.93                 | pos         | 354.1322                       | 354.1341                    | -0.5           | C <sub>20</sub> H <sub>20</sub> NO <sub>5</sub> <sup>+</sup> | Protopine <sup>a</sup>                 | 354.1                    | 1.63                                |
| 13  | 17.89                 | pos         | 370.1617                       | 370.1654                    | -1.0           | C <sub>21</sub> H <sub>24</sub> NO <sub>5</sub> <sup>+</sup> | Allocriptopine                         | 370.2                    | 0.72 <sup>b</sup>                   |
| 14  | 18.66                 | pos         | 324.1151                       | 324.1236                    | -2.6           | C <sub>19</sub> H <sub>18</sub> NO <sub>4</sub> <sup>+</sup> | Tetrahydrocoptisine <sup>a</sup>       | 324.1                    | 0.83                                |
| 15  | 19.17                 | pos         | 356.1862                       | 356.1862                    | 0              | C <sub>21</sub> H <sub>26</sub> NO <sub>4</sub> <sup>+</sup> | Tetrahydropalmatine <sup>a</sup>       | 356.2                    | 1.54                                |
| 16  | 19.52                 | pos         | 356.1869                       | 356.1862                    | 0.2            | C <sub>21</sub> H <sub>26</sub> NO <sub>4</sub> <sup>+</sup> | Glaucine                               | 356.2                    | 0.73 <sup>b</sup>                   |
| 17  | 21.59                 | pos         | 370.2031                       | 370.2018                    | 0.4            | C <sub>22</sub> H <sub>28</sub> NO <sub>4</sub> <sup>+</sup> | Corydaline <sup>a</sup>                | 370.2                    | 7.92                                |
| 18  | 22.17                 | pos         | 336.1205                       | 336.1236                    | -0.9           | C <sub>20</sub> H <sub>18</sub> NO <sub>4</sub>              | Berberine <sup>a</sup>                 | 336.1                    | 0.82                                |
| 19  | 22.87                 | pos         | 366.1655                       | 366.1705                    | -1.4           | C <sub>22</sub> H <sub>24</sub> NO <sub>4</sub>              | Dehydrocorydaline <sup>a</sup>         | 366.2                    | 8.64                                |
| 20  | 28.91                 | pos         | 233.1542                       | 233.1550                    | -3.4           | C <sub>15</sub> H <sub>20</sub> NO <sub>2</sub>              | Costuslactone                          | 233.2                    | 0.63 <sup>b</sup>                   |

<sup>a</sup> Confirmed by reference compounds.

<sup>b</sup> Relative content to internal standard.

**Table 3S.** Precursor/product ion pairs and parameters for MRM of the marker compounds

| Analyte                                | Retention time<br>(min) | [M + H] <sup>+</sup> (m/z) | MRM transitions<br>(Precursor→product) | Cone<br>voltage<br>(V) | Collision<br>energy (eV) |
|----------------------------------------|-------------------------|----------------------------|----------------------------------------|------------------------|--------------------------|
| <b>1</b> Phytosphingosine              | 11.71                   | 318.30                     | 318.30→256.26                          | 30                     | 20                       |
| <b>2</b> LysoPC (18:3)                 | 13.67                   | 518.33                     | 518.33→184.07                          | 30                     | 20                       |
| <b>3</b> LysoPC (16:1)                 | 14.16                   | 494.33                     | 494.33→184.07                          | 30                     | 20                       |
| <b>4</b> LysoPC (20:4)                 | 14.44                   | 544.34                     | 544.34→184.07                          | 30                     | 20                       |
| <b>5</b> LysoPC (18:2)                 | 14.75                   | 520.33                     | 520.33→184.07                          | 30                     | 20                       |
| <b>6</b> LysoPC (16:0) <sup>b</sup>    | 15.64                   | 496.34                     | 496.34→184.07                          | 30                     | 20                       |
| <b>7</b> LysoPC (18:1)                 | 16.05                   | 522.36                     | 522.36→184.07                          | 30                     | 20                       |
| <b>8</b> Estrone <sup>b</sup>          | 9.25                    | 271.17                     | 271.17→147.08                          | 30                     | 20                       |
| <b>9</b> 17-Hydroxyprogesterone        | 11.14                   | 331.22                     | 331.22→138.05                          | 30                     | 20                       |
| <b>10</b> Myristoylglycine             | 11.27                   | 286.24                     | 286.24→227.13                          | 30                     | 20                       |
| <b>11</b> Dihydrocortisol <sup>b</sup> | 11.78                   | 365.23                     | 365.23→223.10                          | 30                     | 20                       |
| <b>12</b> Palmitoylglycine             | 12.78                   | 314.27                     | 314.27→255.16                          | 30                     | 20                       |
| <b>13</b> Phytosphingosine             | 13.75                   | 318.30                     | 318.30→184.07                          | 30                     | 20                       |
| <b>14</b> Sphingosine                  | 15.15                   | 338.24                     | 338.24→281.23                          | 30                     | 20                       |
| <b>15</b> LysoPC (10:0)                | 16.74                   | 413.26                     | 413.26→184.07                          | 30                     | 20                       |
| <b>16</b> <b>IS</b>                    | 9.69                    | 748.48                     | 748.48→158.96                          | 30                     | 20                       |

**Figure 1S.** UPLC - ESI- MS base peak intensity (BPI) chromatograms at the positive and negative ion mode of Xiang-Fu-Si-Wu Formula

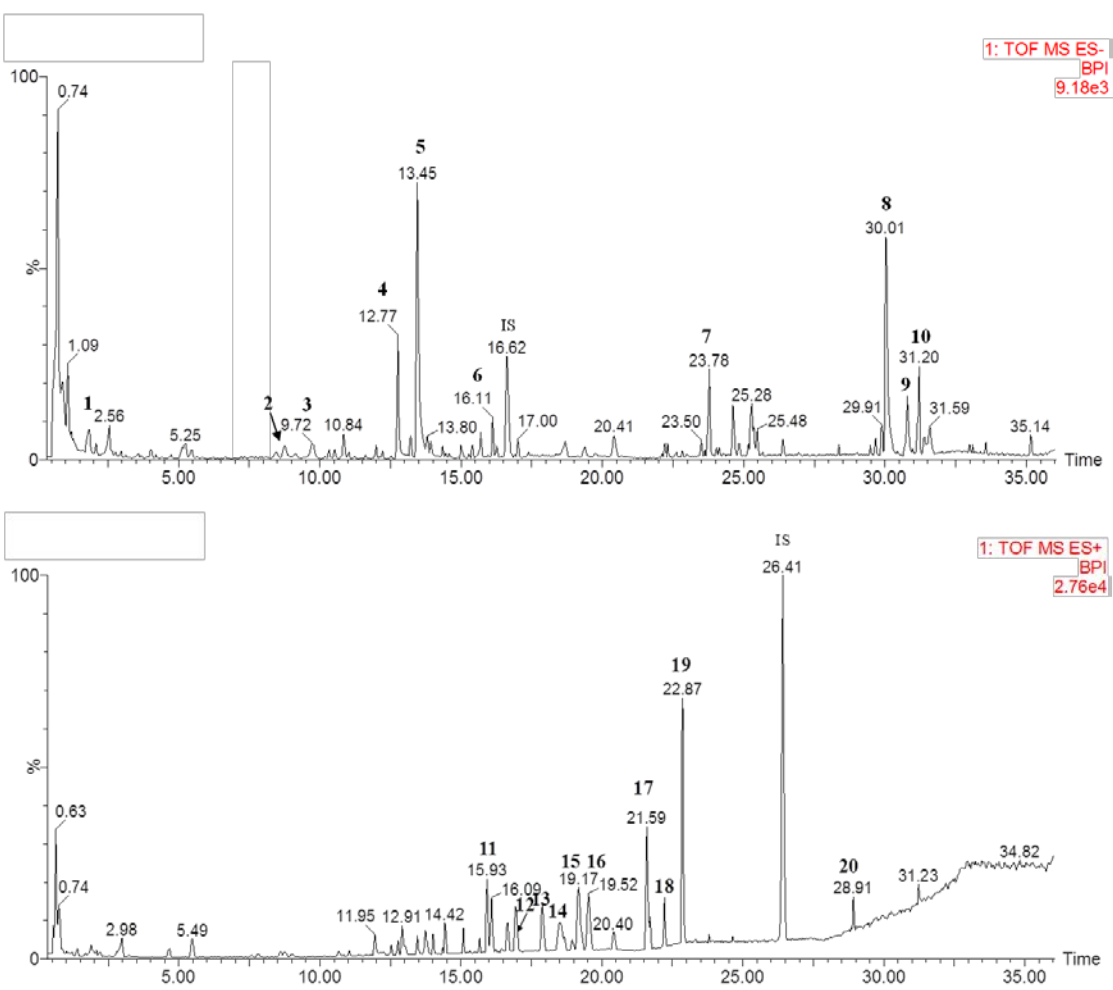



**Figure 2S.** Peak and corresponding mass spectrum of potential markers (Metabolites 1-15).

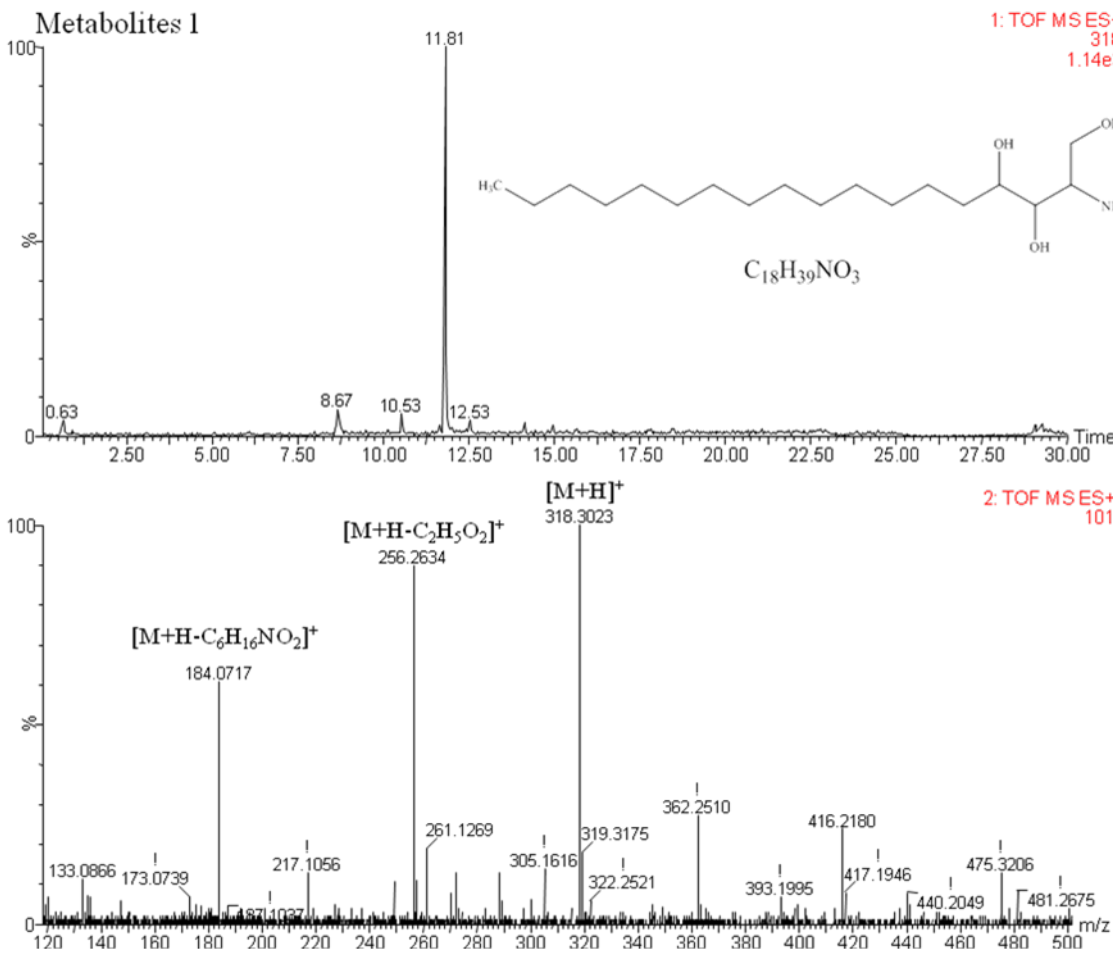

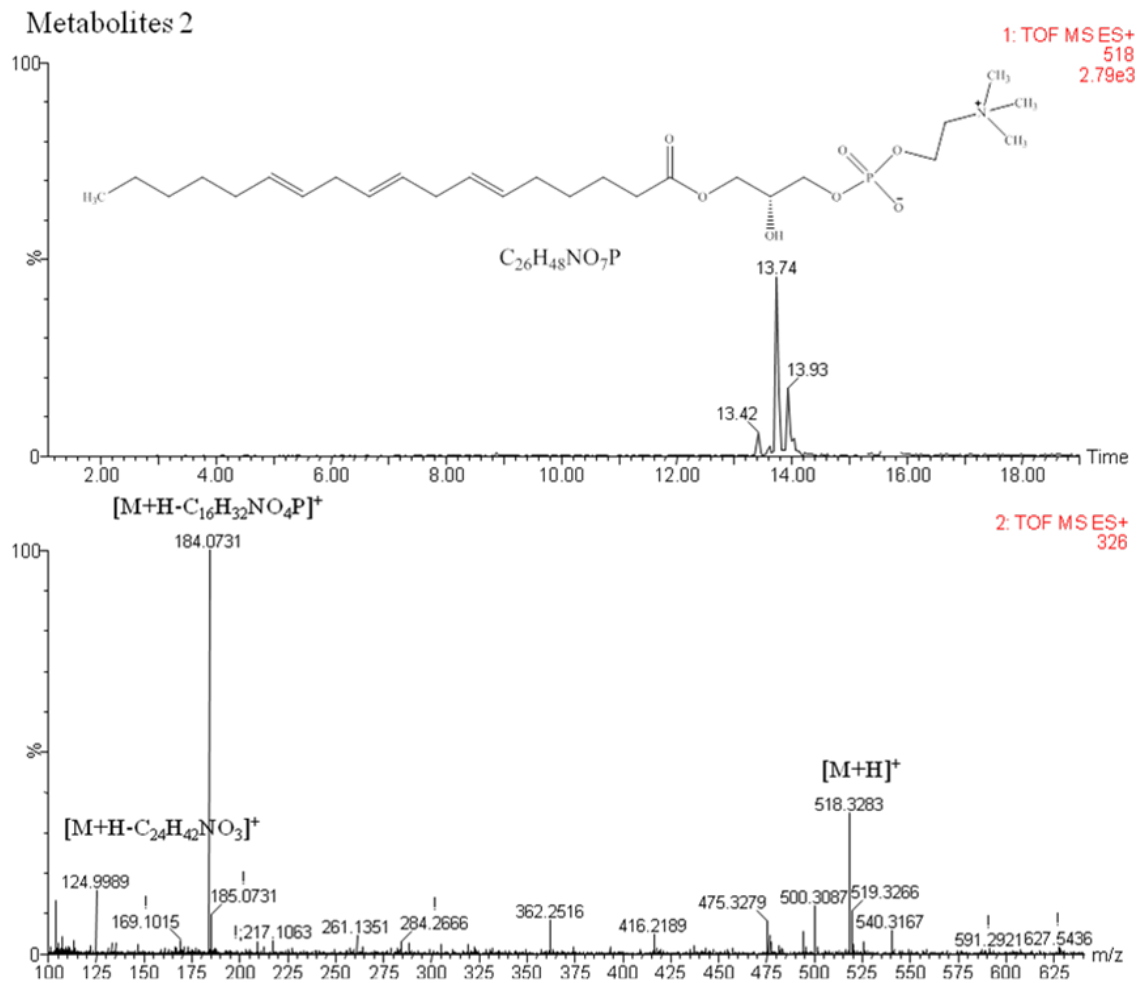

Metabolites 3

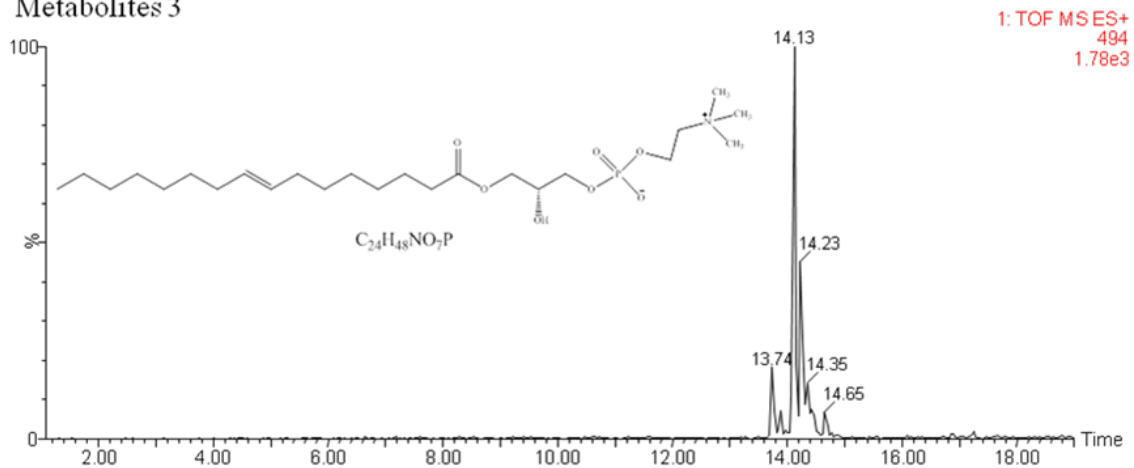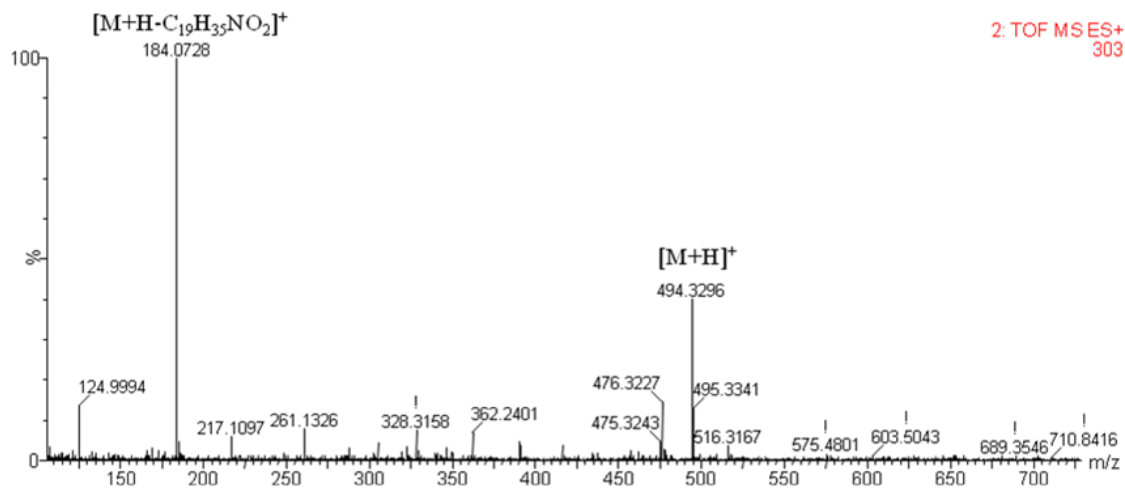

Metabolites 4

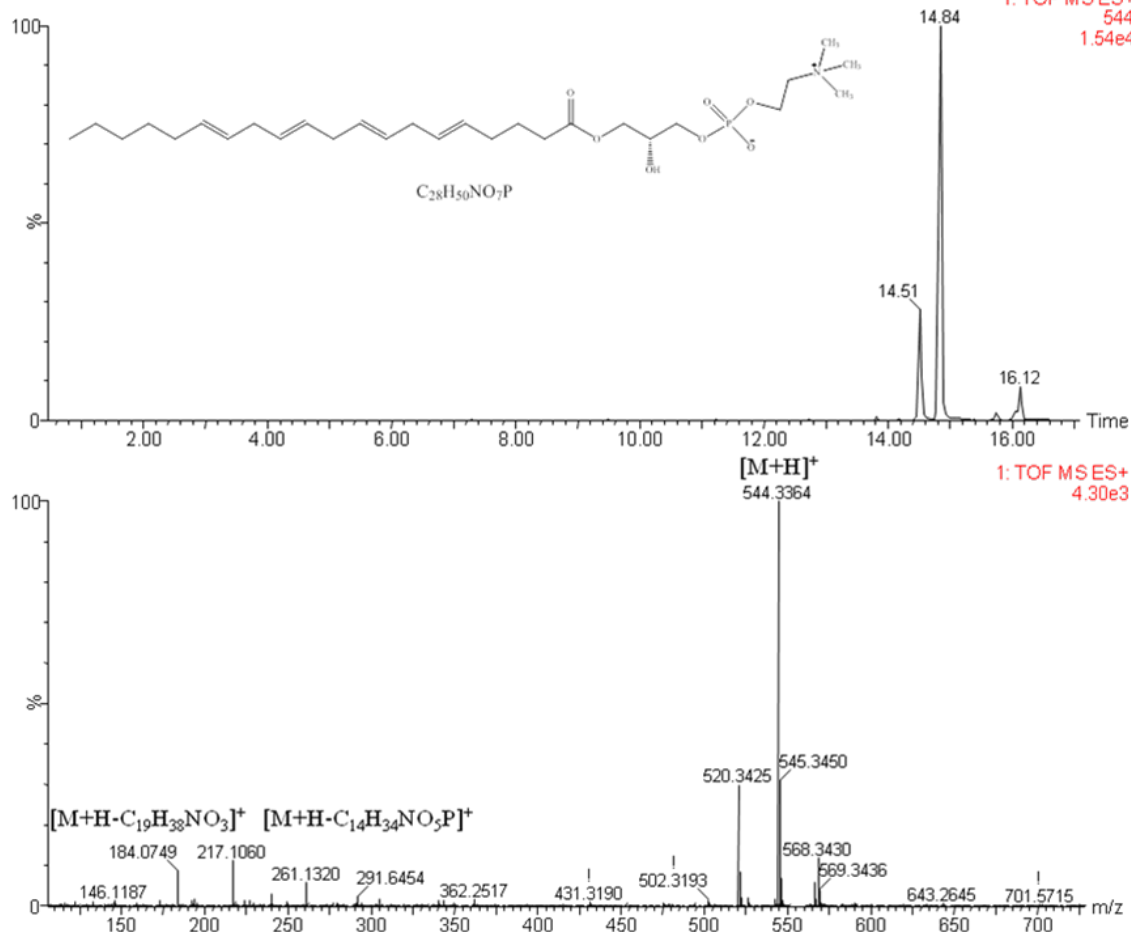

Metabolites 5

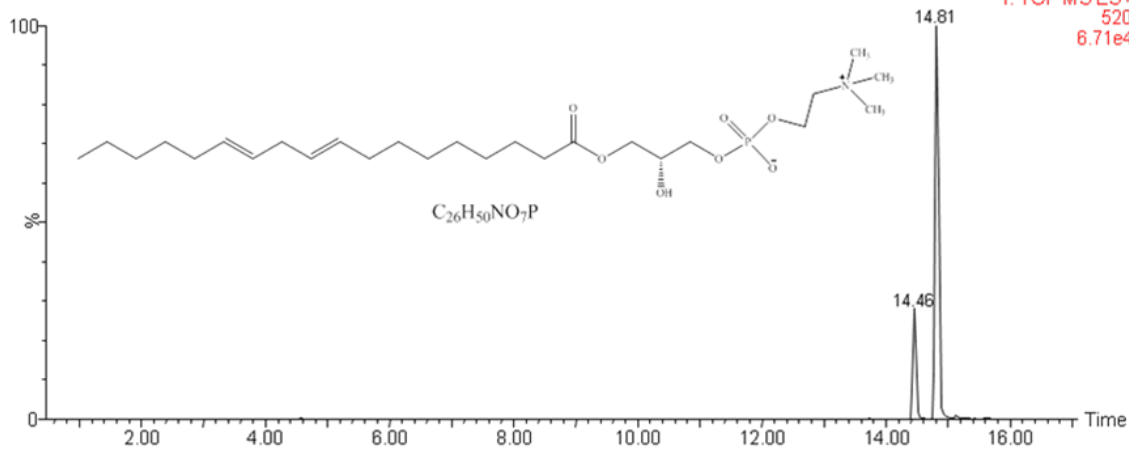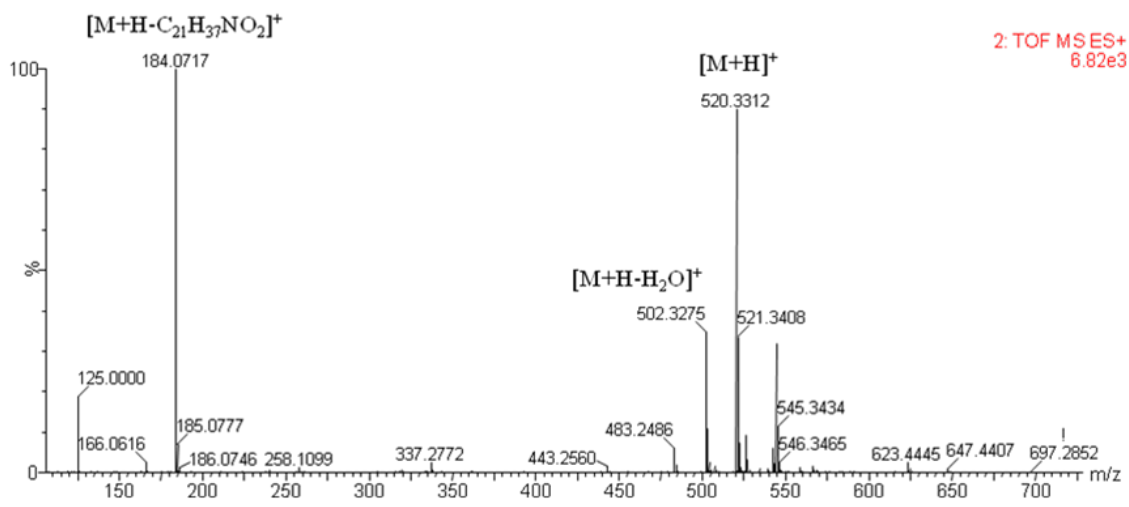



Metabolites 7

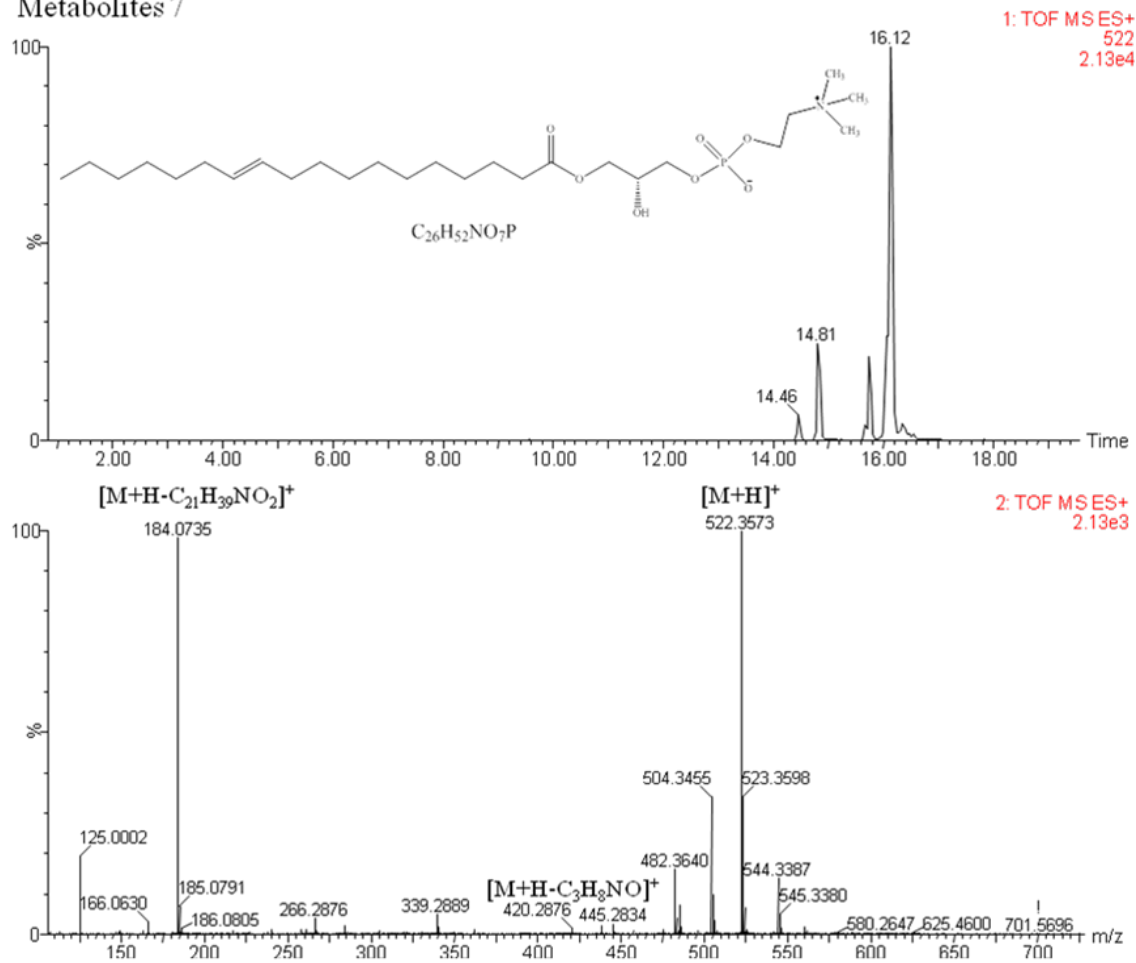

Metabolites 8

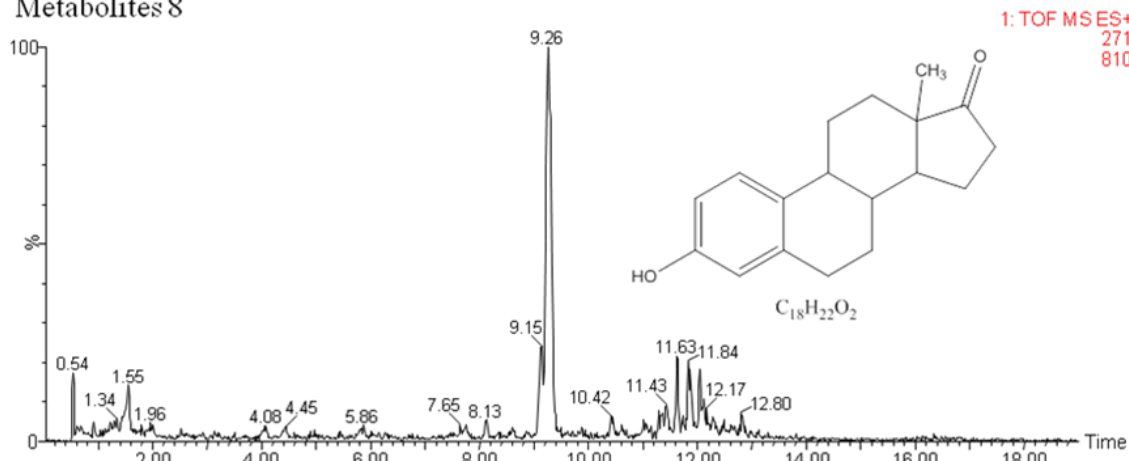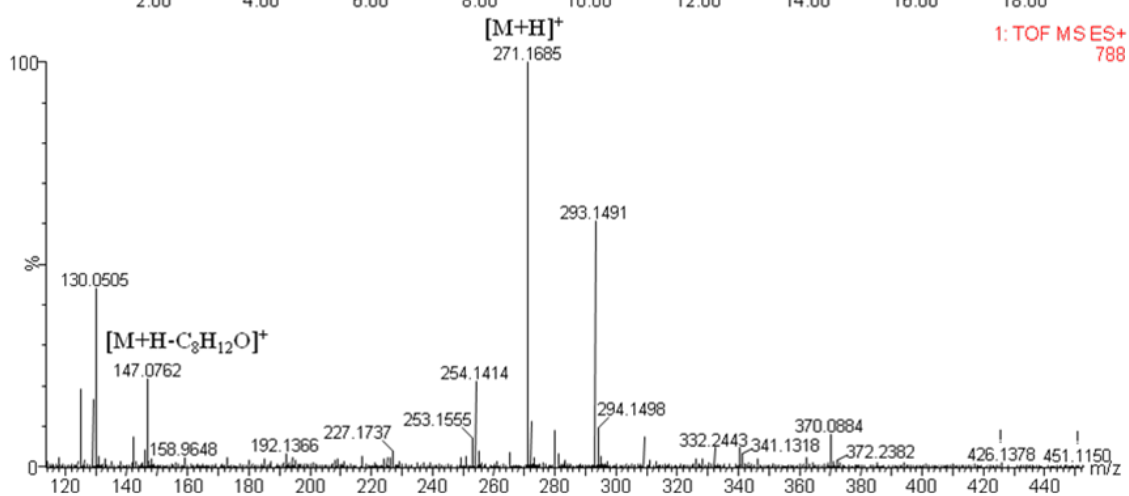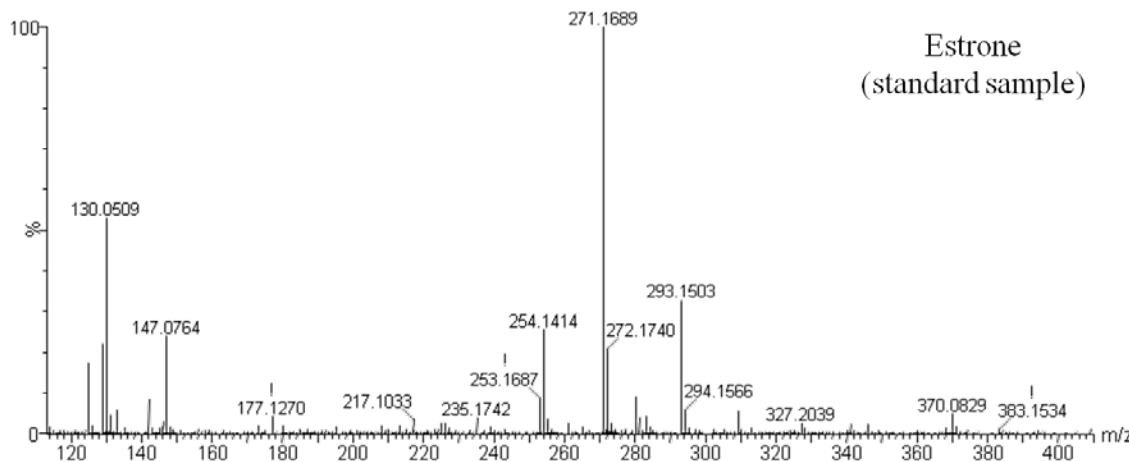



Metabolites 9

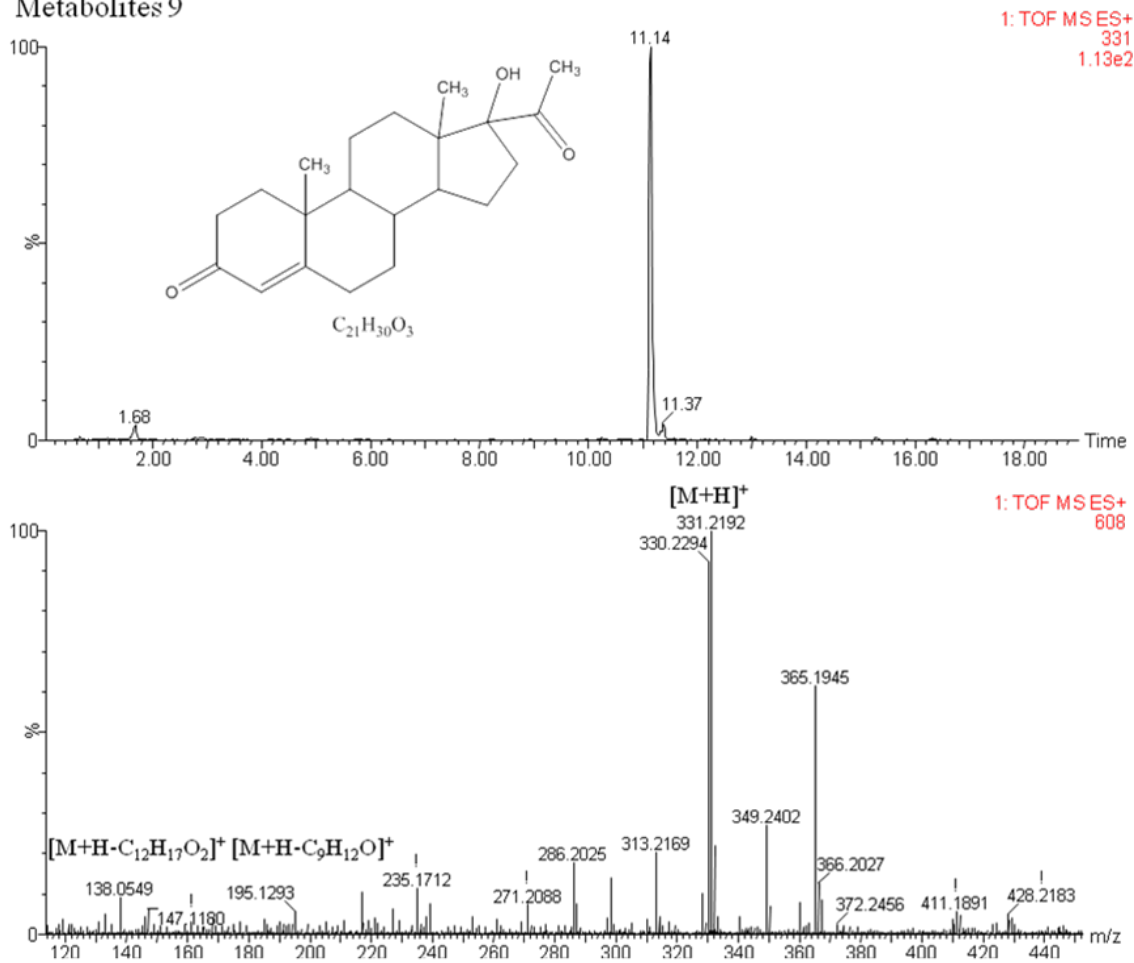

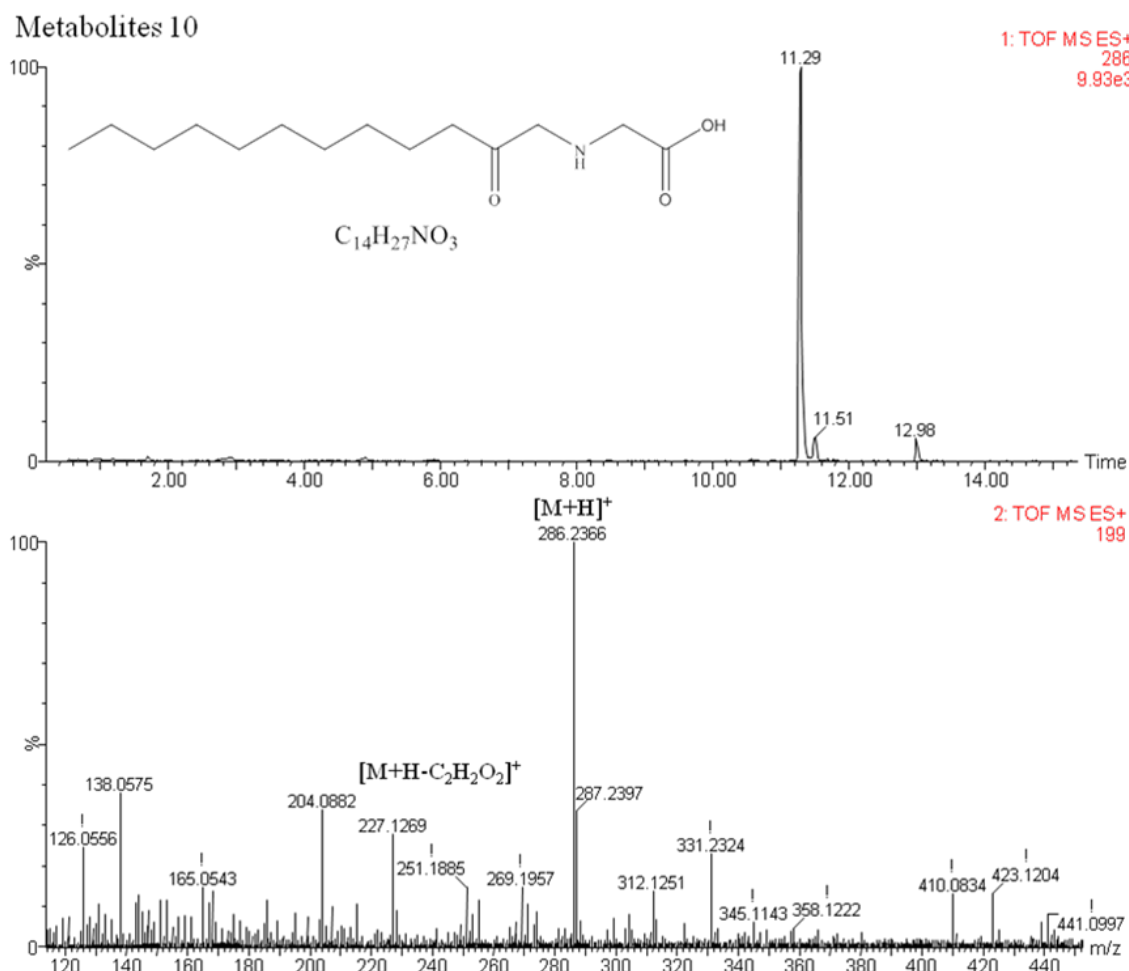

Metabolites 11

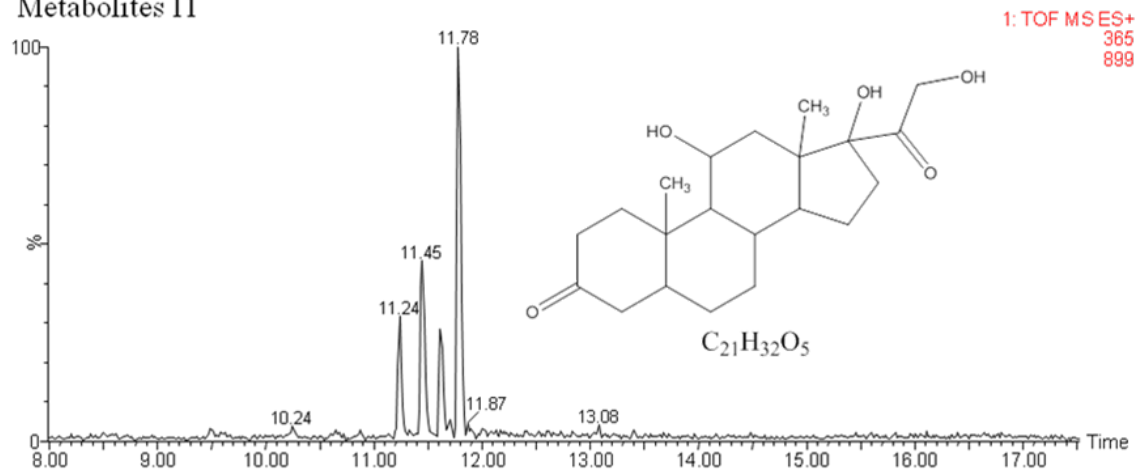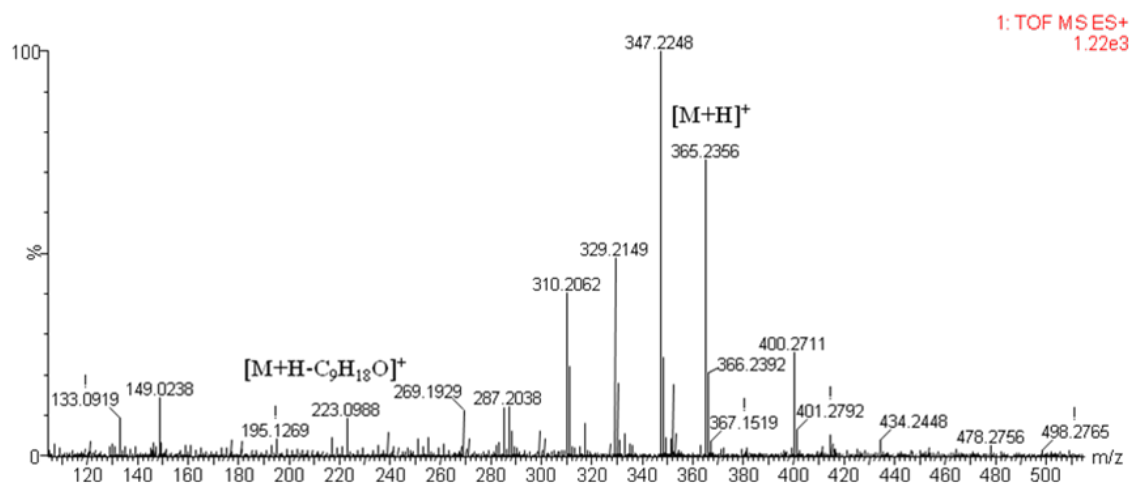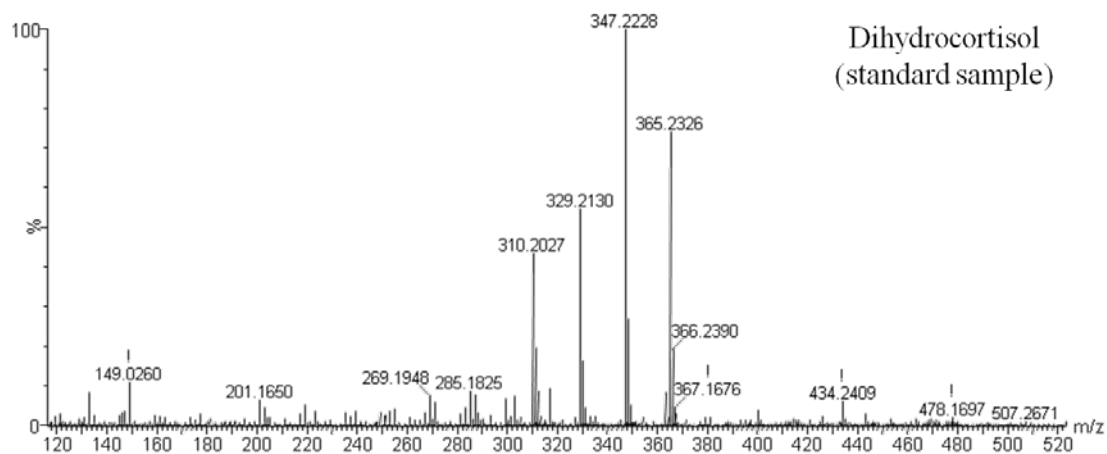

Metabolites 12

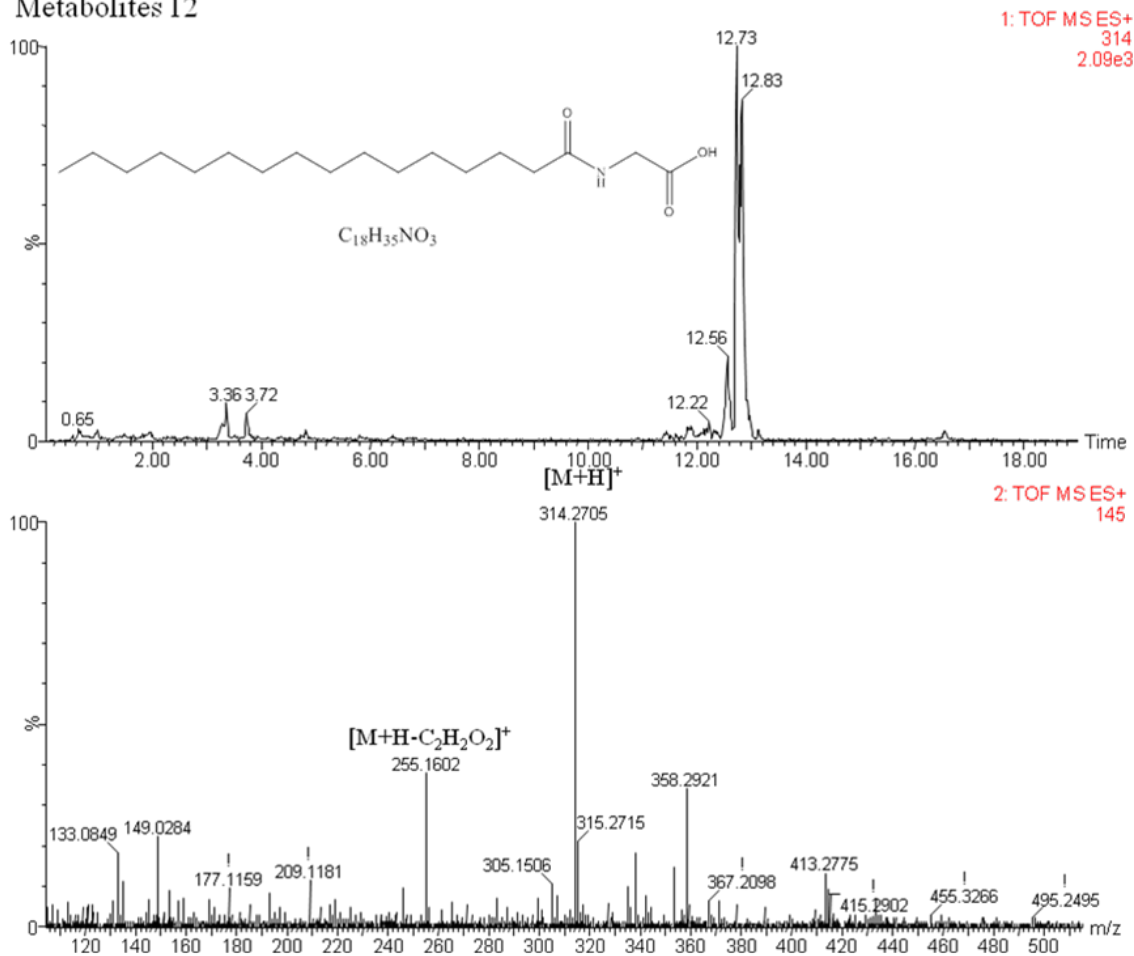

Metabolites 13

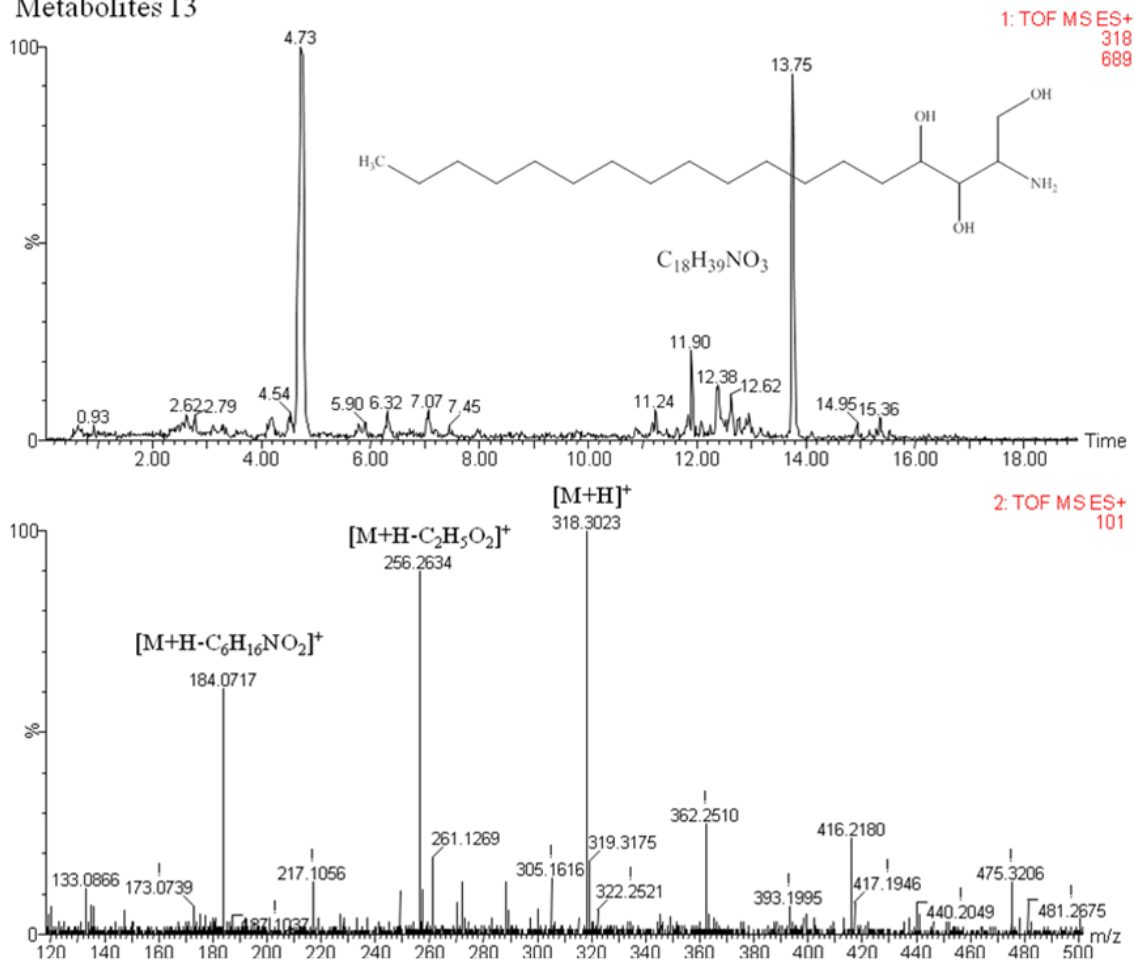

Metabolites 14

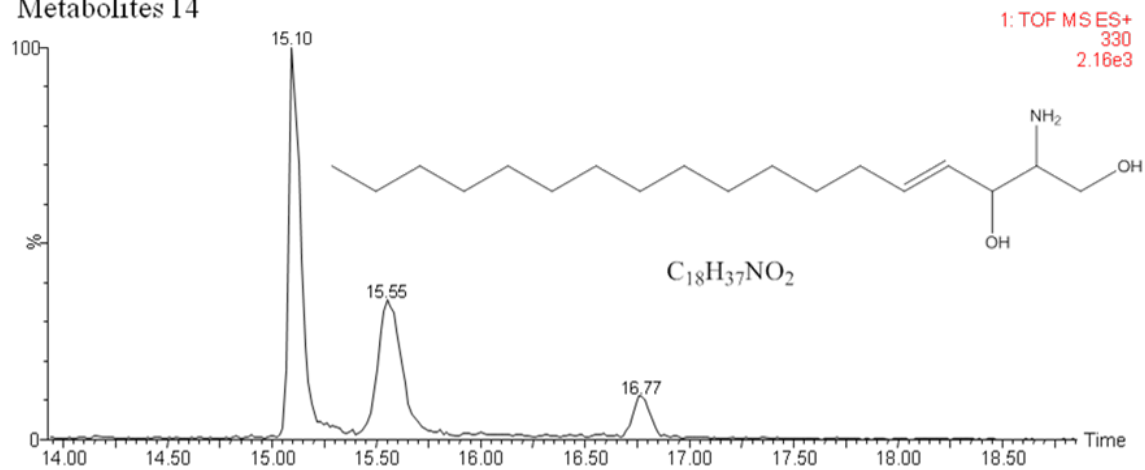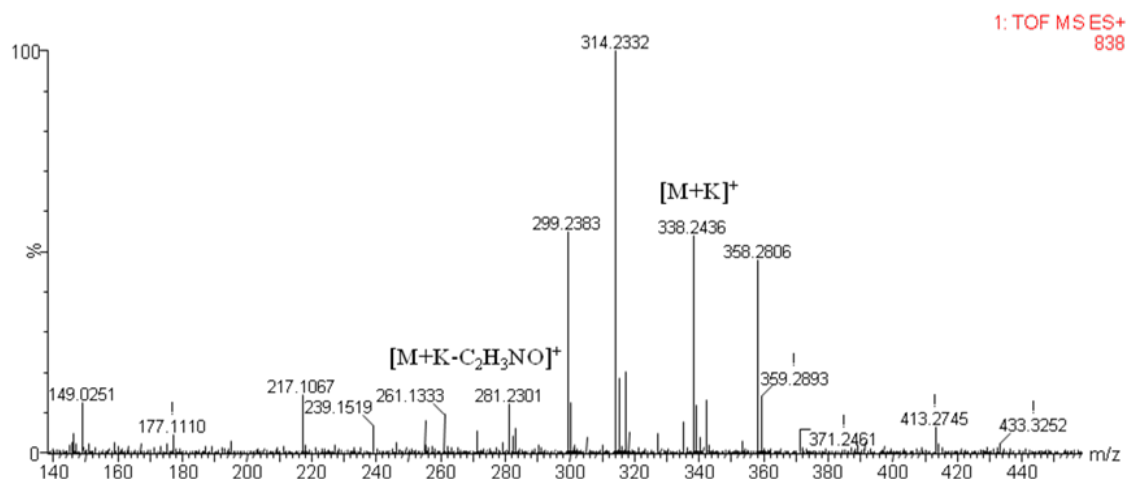

Metabolites 15

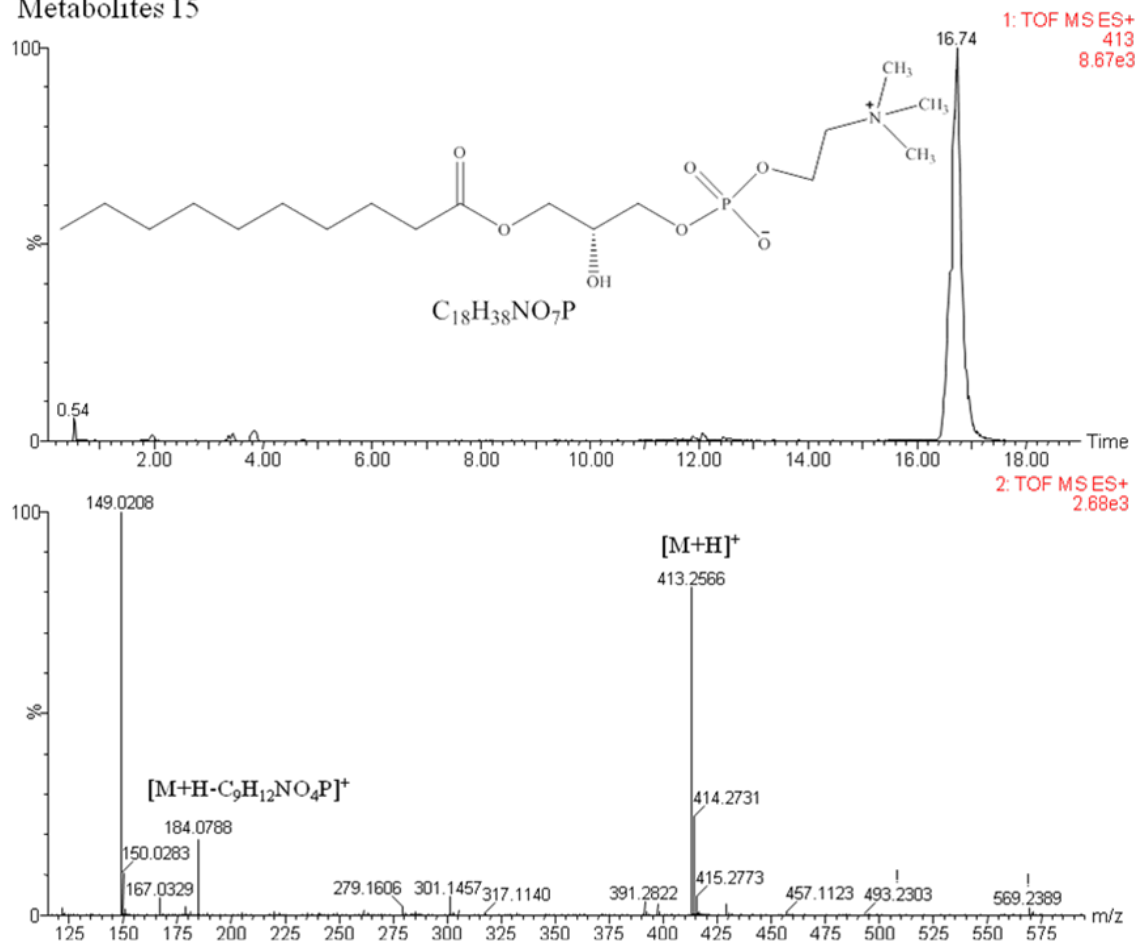

Supplement: c2mb25238d.pdf [file c2mb25238d.pdf]
